# Supplementary material for: Qualitative research study on addressing barriers to healthy diet among low-income individuals at an urban, safety-net hospital
Source: PubMed Central journal article supplement — BMJ Nutr Prev Health. 2020 Sep 9;3(2):383–6. doi: 10.1136/bmjnph-2020-000064 (PMC7841836; doi:10.1136/bmjnph-2020-000064), 2020-09-09
Supplement: bmjnph-2020-000064supp001.pdf [file bmjnph-2020-000064supp001.pdf]

## Appendix A – Questions from Telephone Interview Script

1. *What were your main motivations for enrolling in the program?*
  - i. *Probe – What made you enroll to being with; was it to lose weight, learn more about healthy foods, etc?*
2. *What was the most useful thing(s) you learned in the healthy living classes?*
3. *What did you enjoy most about the classes? And the least?*
4. *What was the goal you set for yourself at the beginning of the program and did you reach it?*
5. *I know there were also vouchers given out as part of the program to use on fruits and vegetables at the common market. Were you able to use up all of those vouchers?*
  - i. *If no, why? If yes, what were you favorite fruits and vegetables you tried?*
6. *Did you attend any of the cooking classes that also took place at the church?*
  - i. *If yes, how many, and have you made any of the things they made at home? If no, what were the main reasons for not attending?*
7. *Since the program ended, about 6 months ago, have you continued to eat a good amount of fruits and vegetables?*
- a. *If not, why not? What are your biggest barriers to healthy eating?*
  - i. *If yes, that's awesome! Do you still use the lessons from the healthy living class, or have any advice for people are looking to eat healthier? What is your favorite place to purchase healthy foods?*
8. *What would it take for you to enroll in this program again?*
9. *What would it take for one of your family members/friends to want to enroll?*

*For those on the list that enrolled, but did not complete the program, I will first ask about the number of classes they attended, and then:*

1. *What were some of the main reasons you did not continue coming to the classes or participate in the prescription program?*
2. *Was there anything in particular that would have made it easier for you to attend the sessions?*

*So in addition to the program, I also wanted to ask some general questions, just about your access to fresh fruits and vegetables, and grocery shopping habits.*

1. *What neighborhood in Atlanta do you live in?*
2. *What is the grocery store you go to most often, and how far is it from your house?*
3. *Do you drive or walk?*
4. *How many people are in your home?*
5. *Do you know about the Fresh Marta Market, or ever shop there?*
6. *Do you receive SNAP benefits?*
  - i. *If yes, have you ever used them at local farmers markets?*
7. *When was your last general check up at the doctor? If given access, would it be ok if I looked at your health numbers, like BMI and cholesterol since the program has ended?*
